# Supplementary material
Source: Springer Nature journal article supplement (https://www.springermedizin.de/resource/supplementary/12879_2011_2085_MOESM1_ESM.pdf/9443346)

Percent survival

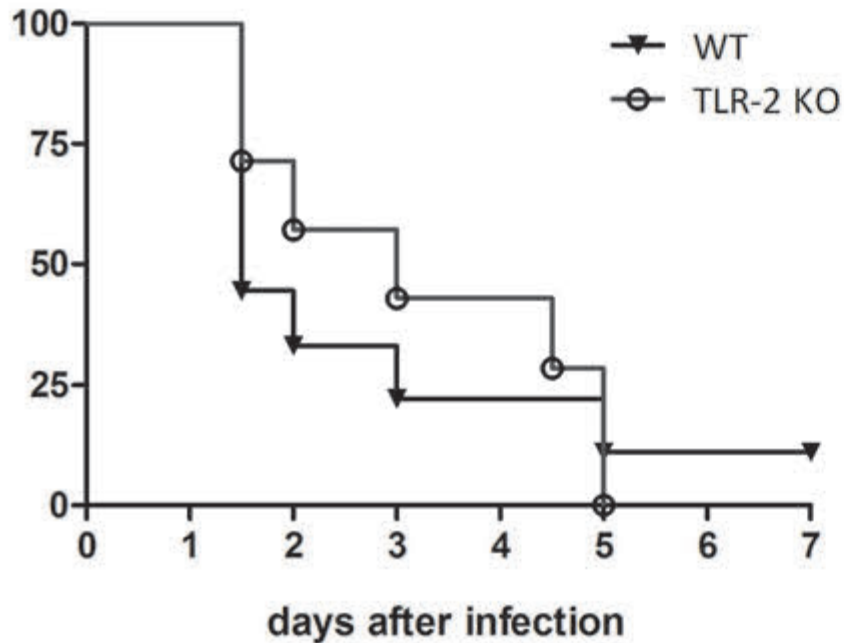

10log CFU / ml

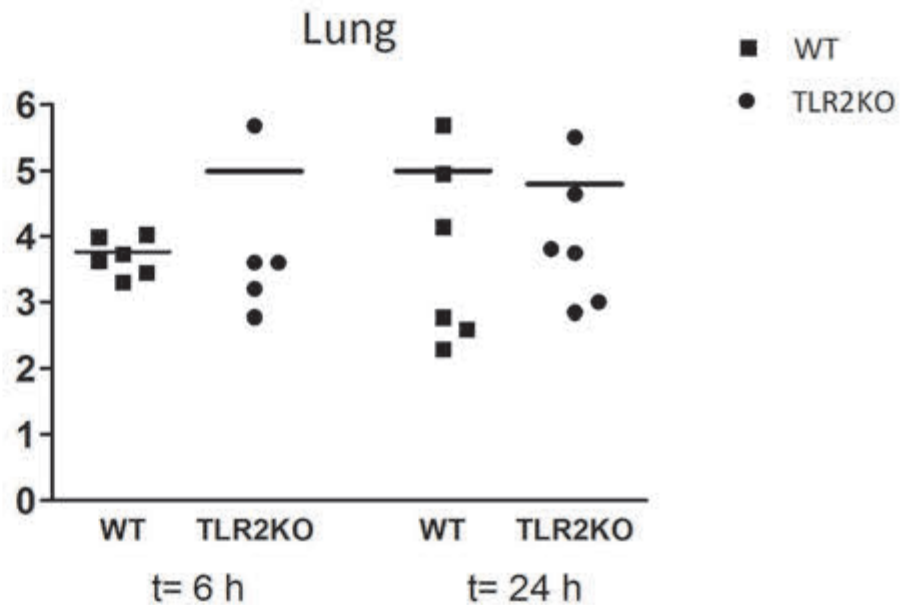

Supplement: MOESM1 [file 9443346]
